# Supplementary material for: From Lab-on-a-Chip to Lab-on-a-Chip-in-the-Lab: a perspective of clinical laboratory medicine for the microtechnologist
Source: Royal Society of Chemistry journal article supplement (doi:10.1039/d4lc00614c), 2025-01-01
Supplement: d4lc00614c1.pdf [file d4lc00614c1.pdf]

Supplemental:

| <b>TABLE X CLIA Part 493 Laboratory Requirements At A Glance</b> |                                                                                                                                                                    |                                                                                                                                                                                                                            |
|------------------------------------------------------------------|--------------------------------------------------------------------------------------------------------------------------------------------------------------------|----------------------------------------------------------------------------------------------------------------------------------------------------------------------------------------------------------------------------|
| <b>Subpart A</b>                                                 | <b>General Provisions</b>                                                                                                                                          | Defines test complexities (waived, provider performed microscopy, non-waived (moderate vs high complexity)                                                                                                                 |
| <b>Subpart B</b>                                                 | <b>Certificate of Waiver</b>                                                                                                                                       | Applies only to labs performing waived tests.                                                                                                                                                                              |
| <b>Subpart C</b>                                                 | <b>Registration Certificate, Certificate for Provider-performed Microscopy Procedures, and Certificate of Compliance</b>                                           | Applies only to labs performing provider performed microscopy                                                                                                                                                              |
| <b>Subpart D</b>                                                 | <b>(D) Certificate of Accreditation</b>                                                                                                                            | Accreditation requirements.                                                                                                                                                                                                |
| <b>Subpart E</b>                                                 | <b>(E) Accreditation by a Private, Nonprofit Accreditation Organization or Exemption Under an Approved State Laboratory Program</b>                                |                                                                                                                                                                                                                            |
| <b>Subpart F</b>                                                 | <b>General Administration</b>                                                                                                                                      |                                                                                                                                                                                                                            |
| <b>Subpart H</b><br><b>Subpart I</b>                             | <b>(H) Participation in Proficiency Testing for Laboratories Performing Nonwaived Testing</b><br><br><b>(I) Proficiency Testing Programs for Nonwaived Testing</b> | General and discipline specific ** requirements for proficiency testing.                                                                                                                                                   |
| <b>Subpart J</b>                                                 | <b>Facility Administration for Nonwaived Testing</b>                                                                                                               | Facility requirements.                                                                                                                                                                                                     |
| <b>Subpart K</b>                                                 | <b>Quality System for Nonwaived Testing</b>                                                                                                                        | Discipline specific ** requirements for quality nonwaived testing.                                                                                                                                                         |
| <b>Subpart L</b>                                                 | <b>General Laboratory Systems</b>                                                                                                                                  | General requirements regarding patient and specimen issues Also listed are specific requirements associated with preanalytic, analytic (general and discipline specific **) and postanalytic phases of laboratory testing. |
| <b>Subpart M</b>                                                 | <b>Personnel for Nonwaived Testing</b>                                                                                                                             | Personnel requirements for nonwaived testing across test complexity (moderate vs high) and discipline and role (director through testing staff)                                                                            |

|                                |                               |                                                                                       |
|--------------------------------|-------------------------------|---------------------------------------------------------------------------------------|
| <b>Subpart Q</b>               | <b>Inspection</b>             | Inspection requirements across complexity and discipline                              |
| <b>Subpart R</b>               | <b>Enforcement Procedures</b> | Details regarding sanctions and penalties.                                            |
| <b>Subpart T</b>               | <b>Consultations</b>          | Establishment and function of the Clinical Laboratory Improvement Advisory Committee. |
| <b>Subparts L, N-P &amp; S</b> | <b>[Reserved]</b>             |                                                                                       |

**\*\* Bacteriology, mycobacteriology, mycology, parasitology, virology, syphilis serology, general immunology, routine chemistry, urinalysis, endocrinology, toxicology, hematology, immunohematology, histopathology, oral pathology, cytology, clinical cytogenetics, radiobioassay and histocompatibility.**

Supplemental Figure 1: CLIA Requirements at a glance as an example of the extensive detail required for CLIA license from *Title 42—Public Health Chapter IV—Centers for Medicare & Medicaid Services, Department of Health and Human Services*  
<https://www.ecfr.gov/current/title-42/chapter-IV/subchapter-G/part-493/>  
*Subchapter G—Standards and Certification.*
